# Supplementary material for: Optical fiber temperature sensor of Er3+/Yb3+ codoped LaGaO3 microcrystals with high reliability and stability
Source: Royal Society of Chemistry journal article supplement (doi:10.1039/d2tc01462a), 2022-01-01
Supplement: d2tc01462a1.pdf [file d2tc01462a1.pdf]

## Supporting Information

# Optical fiber temperature sensor of Er<sup>3+</sup>/Yb<sup>3+</sup> codoped LaGaO<sub>3</sub> microcrystals with high reliability and stability

Haibo Xu,<sup>1</sup> Yanbang Lian,<sup>2\*</sup> Zhanling Lu,<sup>1</sup> Ilya Kolesnikov,<sup>3</sup> Yingjie Zhao,<sup>4</sup> Kun He,<sup>4</sup> Zewen Su,<sup>4</sup> Gongxun Bai,<sup>4\*</sup> Shiqing Xu<sup>4</sup>

<sup>1</sup>*College of Materials Science and Engineering, Zhengzhou University, Zhengzhou 450001, Henan, China*

<sup>2</sup>*Radiology Department, The First Affiliated Hospital of Zhengzhou University, Zhengzhou University, Zhengzhou 450000, China*

<sup>3</sup>*Center for Optical and Laser Materials Research, St. Petersburg State University, Uljanovskaya 5, St. Petersburg, Russia*

<sup>4</sup>*Key Laboratory of Rare Earth Optoelectronic Materials and Devices of Zhejiang Province, China Jiliang University, Hangzhou 310018, China*

\*Corresponding author. E-mail: lybang0507@126.com (Y Lian), baigx@cjlu.edu.cn (G Bai)

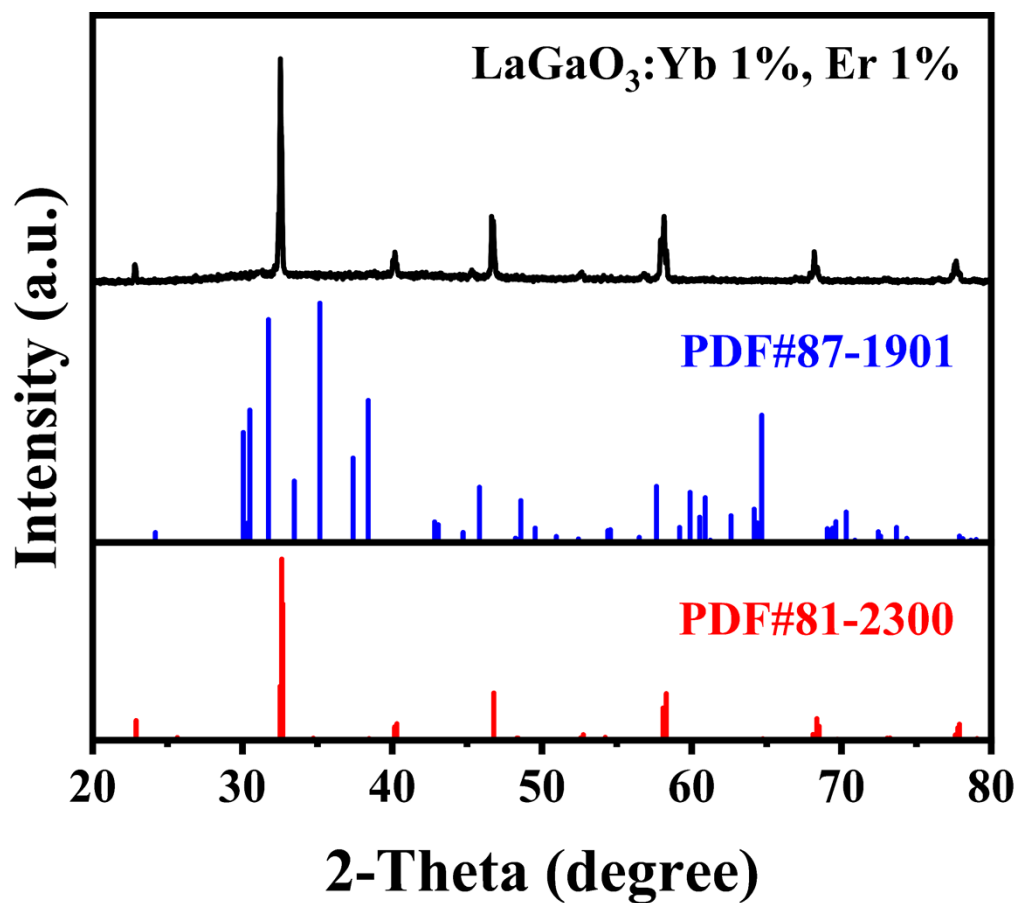

Figure S1. The XRD patterns of LaGaO<sub>3</sub>:1% Yb, 1% Er and standard pattern (PDF# 81-2300 LaGaO<sub>3</sub>) and (PDF# 87-1901 Ga<sub>2</sub>O<sub>3</sub>).
